# Supplementary material
Source: ML conference proceedings conference paper supplement (https://openaccess.thecvf.com/content/cvpr_2017/html/Gholami_Probabilistic_Temporal_Subspace_2017_CVPR_paper.html)
Supplement: Supplementary file 1 [file Gholami_Probabilistic_Temporal_Subspace_2017_CVPR_supplemental.pdf]

# Probabilistic Temporal Subspace Clustering: Supplementary Material

Behnam Gholami  
Department of Computer Science  
Rutgers University  
bb510@cs.rutgers.edu

Vladimir Pavlovic  
Department of Computer Science  
Rutgers University  
vladimir@cs.rutgers.edu

## 1. Non-parametric EM Algorithm for Probabilistic Temporal Subspace Clustering

The proposed model can be formally defined as

$$f^s \sim GP(0, \mathcal{K}), \quad s = 1, 2, \dots, S \quad (1)$$

$$\beta_s^n = \sigma(f^s(t_n)) \prod_{l=1}^{s-1} (1 - \sigma(f^l(t_n))), \quad n = 1, \dots, N, \quad s = 1, 2, \dots, S \quad (2)$$

$$c_n | \beta_1^n, \dots, \beta_S^n \sim Multi(\beta_1^n, \beta_2^n, \dots, \beta_S^n), \quad n = 1, \dots, N, \quad (3)$$

$$\pi_{ks} \sim Beta(a/K, b(K-1)/K), \quad s = 1, \dots, S, \quad k = 1, \dots, K, \quad (4)$$

$$z_{ks} | \pi_{ks} \sim Ber(\pi_{ks}), \quad s = 1, \dots, S, \quad k = 1, \dots, K, \quad (5)$$

$$w_{s,n} \sim \mathcal{N}(0, \gamma_{s,n}^{-1} \mathbf{I}), \quad s = 1, \dots, S, \quad n = 1, \dots, N, \quad (6)$$

$$x_n | z_s, w_{s,n}, \Phi, \mu, \alpha_s \sim \sum_{s=1}^S \beta_s \mathcal{N}(x_n; \Phi_s(z_s \odot w_{s,n}) + \mu_s, \alpha_s^{-1} \mathbf{I}), \quad s = 1, \dots, S, \quad n = 1, \dots, N, \quad (7)$$

where *Multi* denotes the multinomial distribution.

### E step:

In this step the parameters are fixed, and the variational distributions are updated by maximizing the lower bound using a coordinate ascent algorithm.

#### Update for $w_{s,n}$ :

One can show that  $q(w_{s,n})$  is a  $\mathcal{N}(m_{s,n}, \Sigma_{s,n})$  with parameters

$$(\Sigma_{s,n})^{-1} = \gamma_{s,n} \mathbf{I} + (\alpha_s)^{-1} Z_s (\Phi_s)^\top \Phi_s Z_s \quad (8)$$

$$m_{s,n} = \gamma_{s,n} \Sigma_{s,n} (\Phi_s Z_s)^\top (x_n - \mu_s) \quad (9)$$

where  $Z_s$  is a diagonal matrix with entries taken from the vector  $z_s$ .

#### Update for $\pi_s = [\pi_{1s}, \dots, \pi_{Ks}]$ :

One can show that  $q(\pi_{ks})$  is a *Beta*( $\pi_{ks}; a_{ks}, b_{ks}$ ) where

$$a_{ks} = a/K + z_{ks}, \quad b_{ks} = b(K-1)/K + 1 - z_{ks} \quad (10)$$

**M step:**

In this step, the parameters are computed by maximizing the expected complete-data log likelihood  $\log p(\mathbf{X}, \mathcal{T}, \Theta, \Omega)$  while keeping the parameters of the posterior distribution  $Q(\Omega)$  fixed.

**Update for  $\Phi_s$ :**

One can show that  $\Phi_s$  can be analytically updated as

$$\Phi_s = \left[ \sum_{n=1}^N \mathbf{1}[c_n = s] (x_n - \mu_s) m_{s,n}^\top Z_s \right] \times \left[ \alpha_s^{-1} \mathbf{I} + \sum_{n=1}^N \mathbf{1}[c_n = s] Z_s (m_{s,n} m_{s,n}^\top + \Sigma_{s,n}) Z_s \right]^{-1}. \quad (11)$$

where  $\mathbf{1}[x]$  denotes the indicator function ( $\mathbf{1}[x] = 1$  if  $x$  is true, 0 otherwise).

**Update for  $\mu_s$ :**

One can show that  $\mu_s$  can be analytically updated as

$$\mu_s = \sum_{n=1}^N \mathbf{1}[c_n = s] (x_n - \Phi_s (z_s \odot m_{s,n})) / \sum_{n=1}^N \mathbf{1}[c_n = s]. \quad (12)$$

**Update for  $\alpha_s$ :**

One can show that  $\alpha_s$  can be analytically updated as

$$\alpha_s^{-1} = \frac{\sum_{n=1}^N \mathbf{1}[c_n = s] \left( \|x_n - \mu_s - \Phi_s (z_s \odot m_{s,n})\|^2 + \text{tr}(\Phi_s Z_s \Sigma_{s,n} Z_s) \right)}{d \sum_{n=1}^N \mathbf{1}[c_n = s]}. \quad (13)$$

**Update for  $\gamma_{s,n}$ :**

One can show that  $\gamma_{s,n}$  can be analytically updated as

$$\gamma_{s,n}^{-1} = \frac{m_{s,n}^\top m_{s,n} + \text{tr}(\Sigma_{s,n})}{K}. \quad (14)$$

**Update for  $c_n$ :**

$$c_n = \arg \max_{c_n \in \{1, 2, \dots, S\}} \mathcal{L}(c_n), \quad (15)$$

where

$$\begin{aligned} \mathcal{L}(c_n) &= \sum_{s=1}^S \mathbb{E}_{q(w_{s,n})} [\log p(x_n | c_n, z_s, w_{s,n}, \Phi_s, \mu_s, \alpha_s)] + \log p(c_n | t_n, f^1, \dots, f^S) \\ &= \sum_{s=1}^S -\frac{\alpha_s}{2} \mathbf{1}[c_n = s] \|x_n - \mu_s - \Phi_s (z_s \odot m_{s,n})\|^2 \\ &\quad + \sum_{s=1}^S \mathbf{1}[c_n = s] \left[ \frac{D(\log \alpha_s - \log 2\pi)}{2} - \frac{\alpha_s}{2} \text{tr}(\Phi_s Z_s \Sigma_{s,n} Z_s) \right] \\ &\quad + \sum_{s=1}^S \mathbf{1}[c_n = s] \left[ \log \sigma(f^s(t_n)) + \sum_{l=1}^{s-1} \log(1 - \sigma(f^l(t_n))) \right] \end{aligned} \quad (16)$$

Intuitively, the first two terms in Eq. 16 are data-dependent terms and the last term corresponds to the (approximate) **GP-GEM** prior penalty. The value of the last term will be very negative for low-probability cluster indices, as learned through inference.

---

**Algorithm 1** Obtaining  $z_s$ 


---

**Require:**  $\{x_n\}, \Phi_s, \alpha_s, \mu_s, q(w_{s,n}), q(\pi_{1s}, \dots, \pi_{Ks}),$

- 1: set  $z_s = 0$  and index set  $\mathcal{I} = \emptyset$ .
  - 2: **for**  $k = 1, 2, \dots, K$  **do**
  - 3:   set  $\rho_k^+ = \sum_{n=1}^N -\frac{\alpha_s}{2} \mathbf{1}[c_n = s] \left[ \|x_n - \mu_s - [m_{s,n}]_k \Phi_{s,k}\|^2 + [\Phi_s]_{kk} [\Sigma_{s,n}]_{kk} \right] + \Psi(a_{s,k}) - \Psi(b_{s,k})$
  - 4:   set  $\rho_k^- = \sum_{n=1}^N -\frac{\alpha_s}{2} \mathbf{1}[c_n = s] \|x_n\|^2$
  - 5: **end for**
  - 6: **while**  $\max_k \rho_k^+ - \rho_k^- > 0$  **do**
  - 7:   set  $k' = \arg \max_k \rho_k^+ - \rho_k^-$ ,  $\mathcal{I} \leftarrow \mathcal{I} \cup \{k'\}$ ,  $z_{k's} = 1$ ,  $\rho_{k'}^+ = -\infty$
  - 8:   **for all**  $k \notin \mathcal{I}$  **do**
  - 9:     set  $\rho_k^+ = \sum_{n=1}^N -\frac{\alpha_s}{2} \mathbf{1}[c_n = s] \left[ \|x_n - \mu_s - [\Phi_s]_{\mathcal{I}} [m_{s,n}]_{\mathcal{I}} - [m_{s,n}]_k \Phi_{s,k}\|^2 + \text{tr}([\Phi_s]_{\mathcal{I}} [\Sigma_{s,n}]_{\mathcal{I}}) + [\Phi_s]_{kk} [\Sigma_{s,n}]_{kk} \right] + \Psi(a_{s,k}) - \Psi(b_{s,k})$
  - 10:    set  $\rho_k^- = \sum_{n=1}^N -\frac{\alpha_s}{2} \mathbf{1}[c_n = s] \left[ \|x_n - \mu_s - [\Phi_s]_{\mathcal{I}} [m_{s,n}]_{\mathcal{I}}\|^2 + \text{tr}([\Phi_s]_{\mathcal{I}} [\Sigma_{s,n}]_{\mathcal{I}}) \right]$
  - 11:   **end for**
  - 12: **end while**
  - 13: **return**  $z_s$
- 

It therefore eliminates these clusters from the model by shrinking  $\mathcal{L}(c_n)$  to lower values.

**Update for**  $z_s$ :

$$z_s = \arg \max_{z_s} \mathcal{L}(z_s), \quad s.t. \quad z_s \in \{0, 1\}^K, \quad (17)$$

where

$$\begin{aligned} \mathcal{L}(z_s) &= \sum_{n=1}^N \mathbb{E}_{q(w_{s,n})} [\log p(x_n | c_n, z_s, w_{s,n}, \Phi_s, \mu_s)] + \mathbb{E}_{q(\pi_{1s}, \dots, \pi_{Ks})} [\log p(z_s | \pi_{1s}, \dots, \pi_{Ks})] \\ &= \sum_{n=1}^N -\frac{\alpha_s}{2} \mathbf{1}[c_n = s] \left[ \|x_n - \mu_s - \Phi_s(z_s \odot m_{s,n})\|^2 + \text{tr}(\Phi_s Z_s \Sigma_{s,n} Z_s) \right] \\ &\quad + \sum_{k=1}^K z_{ks} (\Psi(a_{s,k}) - \Psi(b_{s,k})), \quad s.t. \quad z_s \in \{0, 1\}^K. \end{aligned} \quad (18)$$

where  $\Psi(\cdot)$  denotes the **digamma** function. Intuitively, the first term (second line) in Eq. 18 is data dependent term, and the last term corresponds to the Beta distribution penalty. More precisely, the value of the last term will be very small (negative) for low-probability subspace bases, as learned through the EM inference. Hence, it removes these subspace bases from the model by shrinking  $\mathcal{L}(z)$  to smaller values. Since (18) is a combinatorial optimization problem, we use a greedy algorithm (Algorithm 1) similar to Orthogonal Matching Pursuit (OMP) [2] to solve (18).

In Algorithm 1,  $[\mathbf{X}]_{\mathcal{I}}/[x]_{\mathcal{I}}$  denotes the submatrix/subvector of  $\mathbf{X}/x$  formed by the columns/dimensions indexed by  $\mathcal{I}$ . Intuitively, we initialize  $z$  with zero and set sequentially each entry of  $z$  to one, scoring each entry to determine which to set to one.

**Update for**  $f^s = [f^s(t_1), \dots, f^s(t_N)]$

In the following, we denote  $f^s(t_n)$  with  $f_n^s$  for notational simplicity.

$$f^s = \arg \max_{f^s} \mathcal{L}(f^s) \quad (19)$$

where

$$\begin{aligned}
\mathcal{L}(f^s) &= \log(f^s | \mathbb{K}) + \sum_{n=1}^N \log p(c_n = s | f^s) \\
&= -\frac{1}{2} f^{s\top} \mathbb{K}^{-1} f^s + \sum_{n=1}^N \mathbf{1}[c_n = s] \log \sigma(f_n^s) + \sum_{n=1}^N \sum_{l=s+1}^S \mathbf{1}[c_n = l] \log(1 - \sigma(f_n^s)) \\
&= -\frac{1}{2} f^{s\top} \mathbb{K}^{-1} f^s + \sum_{n=1}^N \mathbf{1}[c_n = s] \log \sigma(f_n^s) + \sum_{n=1}^N \mathbf{1}[c_n > s] (\log \sigma(f_n^s) - f_n^s) \\
&\geq -\frac{1}{2} f^{s\top} \mathbb{K}^{-1} f^s + \sum_{n=1}^N \mathbf{1}[c_n = s] \left( \frac{1}{2} f_n^s - \lambda(\xi_{sn}) f_n^{s2} \right) + \sum_{n=1}^N \mathbf{1}[c_n > s] \left( -\frac{1}{2} f_n^s - \lambda(\xi_{sn}) f_n^{s2} \right) \\
&\geq -\frac{1}{2} f^{s\top} \mathbb{K}^{-1} f^s + C_s^\top f^s - \frac{1}{2} f^{s\top} \mathbb{A} f^s
\end{aligned} \tag{20}$$

where

$$C_s = \left[ \frac{1}{2} (\mathbf{1}[c_1 = s] - \mathbf{1}[c_1 > s]), \dots, \frac{1}{2} (\mathbf{1}[c_N = s] - \mathbf{1}[c_N > s]) \right]^\top \tag{21}$$

and  $\mathbb{A}$  is a  $N \times N$  diagonal matrix defined as

$$\mathbb{A} = \begin{pmatrix} 2\lambda(\xi_{s1})(\mathbf{1}[c_1 = s] - \mathbf{1}[c_1 > s]) & & & \\ & 2\lambda(\xi_{s2})(\mathbf{1}[c_2 = s] - \mathbf{1}[c_2 > s]) & & \\ & & \ddots & \\ & & & 2\lambda(\xi_{sN})(\mathbf{1}[c_N = s] - \mathbf{1}[c_N > s]) \end{pmatrix} \tag{22}$$

and  $\{\xi_{sn}\}, s = 1, \dots, S, n = 1, \dots, N$  are the lower bound variational parameters.

One can show that  $f^s$  is updated as

$$f^s = (\mathbb{K}^{-1} + \mathbb{A})^{-1} C_s \tag{23}$$

It should be noted that since  $\mathbb{K}^{-1}$  is a tri-diagonal matrix and  $\mathbb{A}$  is a diagonal matrix, (23) can be efficiently computed in  $O(N^2)$  time.

**Update for  $\xi_{sn}$**

$$\begin{aligned}
\xi_{sn} &= \arg \max_{\xi_{sn}} \mathbf{1}[c_n = s] \log \sigma(f_n^s) + \mathbf{1}[c_n > s] (\log \sigma(f_n^s)) \\
&= \arg \max_{\xi_{sn}} \mathbf{1}[c_n > (s-1)] \left( \log \sigma(\xi_{sn}) - \frac{\xi_{sn}}{2} + \lambda(\xi_{sn}) \xi_{sn}^2 - \lambda(\xi_{sn}) f_n^{s2} \right)
\end{aligned} \tag{24}$$

By setting the derivative of the objective function of the Eq. 24 with respect to  $\xi_{sn}$  equal to zero, we have

$$1 - \sigma(\xi_{sn}) - 1/2 + 2\xi_{sn}\lambda(\xi_{sn}) + \lambda'(\xi_{sn})\xi_{sn}^2 - \lambda'(\xi_{sn})f_n^{s2} = 0 \tag{25}$$

Using definitions of  $\sigma(\xi_{sn})$  and  $\lambda(\xi_{sn})$ , the above Equation can be simplified as

$$\lambda'(\xi_{sn})(\xi_{sn}^2 - f_n^{s2}) = 0 \tag{26}$$

Since  $\lambda'(\xi_{sn})$  is a monotonic function of  $\xi_{sn}$  for  $\xi_{sn} > 0$  and the negative values for  $\xi_{sn}$  can be ignored [1],  $\lambda'(\xi_{sn}) \neq 0$  and hence the update equations for the variational parameters can be obtained as  $\xi_{sn} = f_n^s$ .

**Update for  $\eta$**

$$\eta = \arg \max_{\eta} -\frac{1}{2} \sum_{s=1}^S f^{s\top} \mathbb{K}^{-1} f^s - \frac{1}{2} \log |\mathbb{K}| \tag{27}$$

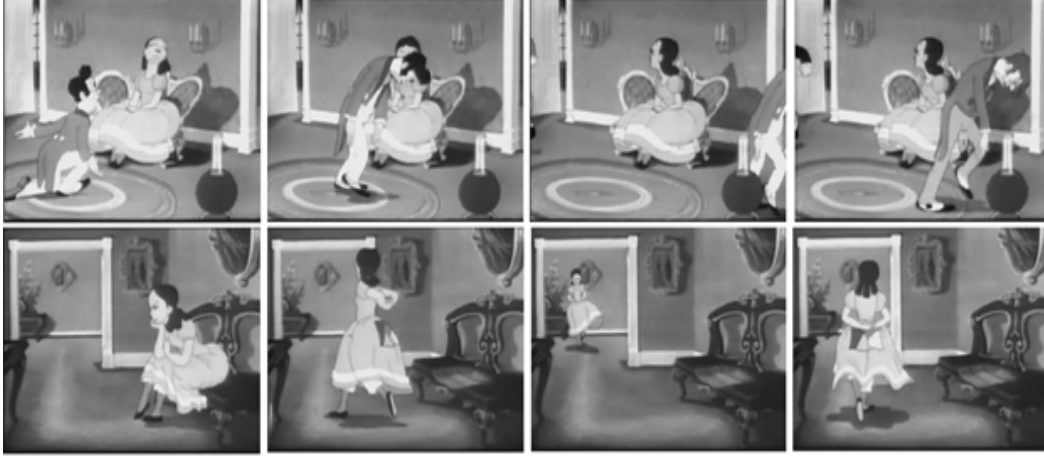

Figure 1. Sample frames from the video scene segmentation dataset. Each row contains some frames belonging to the same scene.

Table 1. ACC with standard deviation on scene segmentation dataset. The best (bold red), the second best (red).

| method          | Sequence-1   | Sequence-2   | Sequence-3   | Sequence-4   | Sequence-5   | Sequence-6   |
|-----------------|--------------|--------------|--------------|--------------|--------------|--------------|
| <b>SSC</b>      | 63.27 ± 3.67 | 65.38 ± 2.82 | 60.03 ± 3.21 | 71.06 ± 2.28 | 64.08 ± 2.81 | 69.99 ± 3.03 |
| <b>LRR</b>      | 67.31 ± 2.99 | 70.83 ± 2.81 | 62.01 ± 2.82 | 70.08 ± 2.69 | 65.31 ± 2.78 | 70.43 ± 2.67 |
| <b>LSR</b>      | 63.28 ± 2.88 | 70.45 ± 2.76 | 60.32 ± 2.68 | 70.71 ± 2.42 | 66.32 ± 2.74 | 71.34 ± 2.12 |
| <b>OSC</b>      | 75.37 ± 2.49 | 80.03 ± 3.27 | 63.21 ± 2.60 | 75.36 ± 2.31 | 70.11 ± 3.96 | 78.44 ± 3.11 |
| <b>TSC</b>      | 73.12 ± 3.20 | 80.11 ± 2.77 | 69.32 ± 2.66 | 83.21 ± 3.00 | 80.10 ± 2.55 | 82.00 ± 2.90 |
| <b>PM (our)</b> | 82.11 ± 4.10 | 87.21 ± 3.31 | 75.31 ± 3.84 | 81.32 ± 2.99 | 79.87 ± 2.81 | 84.64 ± 2.65 |

where  $|\mathbb{K}|$  denotes the determinant of  $\mathbb{K}$ . By setting the derivative of the objective function of the Eq. 27 respect to  $\eta$  equal to zero, we have

$$\frac{1}{2} \text{tr} \left( (\beta \beta^\top - \mathbb{K}^{-1}) (\hat{\mathbb{K}} \odot \mathbb{K}) \right) = 0 \quad (28)$$

where  $\hat{\mathbb{K}}$  is a  $N \times N$  matrix such that

$$\hat{\mathbb{K}}(i, j) = \exp(-|t_i - t_j|), \quad i = 1, \dots, N, j = 1, \dots, N \quad (29)$$

and  $\beta = \mathbb{K}^{-1} f^s$ . Since (28) is a highly nonlinear function of  $\eta$ , its update cannot be computed in closed form. However, since  $\eta$  is a scalar, we simply use the one dimensional gradient descent algorithm to solve (27). It should be noted that The complexity of computing the derivative of the objective function in eq. 28 is dominated by the need to invert the  $\mathbb{K}$  matrix. Since  $\mathbb{K}^{-1}$  can be computed in  $O(N)$  time, the computation of the derivative of the objective function in eq. 28 requires only  $O(N^2)$  time per iteration.

## 2. Video Scene Segmentation Experiments

The goal of this experiment is to segment individual scenes from a video sequence. The video sequence is drawn from a short animation freely available from the Internet Archive<sup>1</sup>. See Fig. 1 for some examples of two sequences to be segmented. Six video sequences, containing three scenes each, are drawn from the dataset. The sequences are around 15-30 seconds in length (approximately 450-900 frames). For this data set, we build a dictionary of the frames with 300 bases using the Orthogonal matching Pursuit (OMP) algorithm [2] and encode each frame as a 300 dimensional sparse vector.

We also set the truncation level for the number of subspaces and their dimension to  $(K = 10, S = 10)$ .

The mean performance along with the standard deviation of each method over 5 runs on the different sequences of the datasets is shown in Tables 1, and 2, from which we can see that the proposed method has better performance than the other

<sup>1</sup><http://archive.org>

Table 2. NMI with standard deviation on scene segmentation dataset. The best (bold red), the second best (red).

| method          | Sequence-1            | Sequence-2            | Sequence-3            | Sequence-4            | Sequence-5            | Sequence-6            |
|-----------------|-----------------------|-----------------------|-----------------------|-----------------------|-----------------------|-----------------------|
| <b>SSC</b>      | 0.5327 ± 0.013        | 0.5038 ± 0.008        | 0.4903 ± 0.016        | 0.5406 ± 0.009        | 0.5708 ± 0.004        | 0.5299 ± 0.012        |
| <b>LRR</b>      | 0.5231 ± 0.009        | 0.5083 ± 0.003        | 0.5001 ± 0.008        | 0.5608 ± 0.011        | 0.5731 ± 0.008        | 0.5143 ± 0.009        |
| <b>LSR</b>      | 0.5028 ± 0.008        | 0.5145 ± 0.009        | 0.4932 ± 0.008        | 0.5571 ± 0.006        | 0.5832 ± 0.006        | 0.5434 ± 0.012        |
| <b>OSC</b>      | 0.5437 ± 0.021        | 0.5503 ± 0.017        | <b>0.5321</b> ± 0.015 | 0.6036 ± 0.004        | 0.6111 ± 0.006        | 0.5544 ± 0.011        |
| <b>TSC</b>      | <b>0.5512</b> ± 0.011 | <b>0.5811</b> ± 0.013 | 0.5232 ± 0.012        | <b>0.6421</b> ± 0.008 | <b>0.6510</b> ± 0.005 | <b>0.6100</b> ± 0.009 |
| <b>PM (our)</b> | <b>0.6111</b> ± 0.021 | <b>0.6321</b> ± 0.018 | <b>0.6357</b> ± 0.017 | <b>0.6933</b> ± 0.011 | <b>0.6833</b> ± 0.015 | <b>0.6877</b> ± 0.020 |

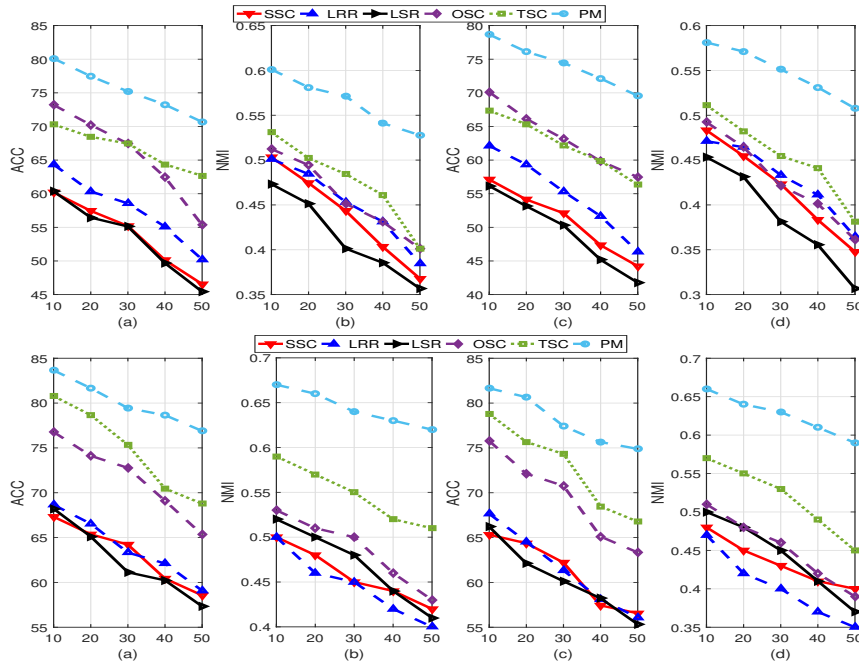

Figure 2. The results of different methods on the scene dataset when the data suffer from the loss of features. First Row: **Sequence 1**. Second Row: **Sequence 6**. Horizontal axes denote the missing rates (%). (a),(b): ACC and NMI results for MAR features, respectively. (c),(d): ACC and NMI results for NMAR features, respectively.

competing methods. This is due the fact that the Optimization-based methods learn the features and cluster them separately (sequentially), while our generative model simultaneously learns the representations and clusters the data points. The key observation is that good representations are beneficial to data clustering, with clustering results providing supervisory signals to representation learning.

### 3. Additional Experiments for missing features

MAR and MNAR results (averaged over 5 runs) for subjects 13, 54, 80 and 113 of Mocap dataset and sequences 1 and 6 of the scene segmentation dataset are provided in the Figs. 3 and 2 respectively. Not surprisingly, for both MAR and MNAR cases, the **PM** is more robust to missing features than other competing methods.

## References

- [1] C. M. Bishop. Pattern recognition. *Machine Learning*, 2006. 4
- [2] J. A. Tropp and A. C. Gilbert. Signal recovery from random measurements via orthogonal matching pursuit. *Information Theory, IEEE Transactions on*, 53(12):4655–4666, 2007. 3, 5

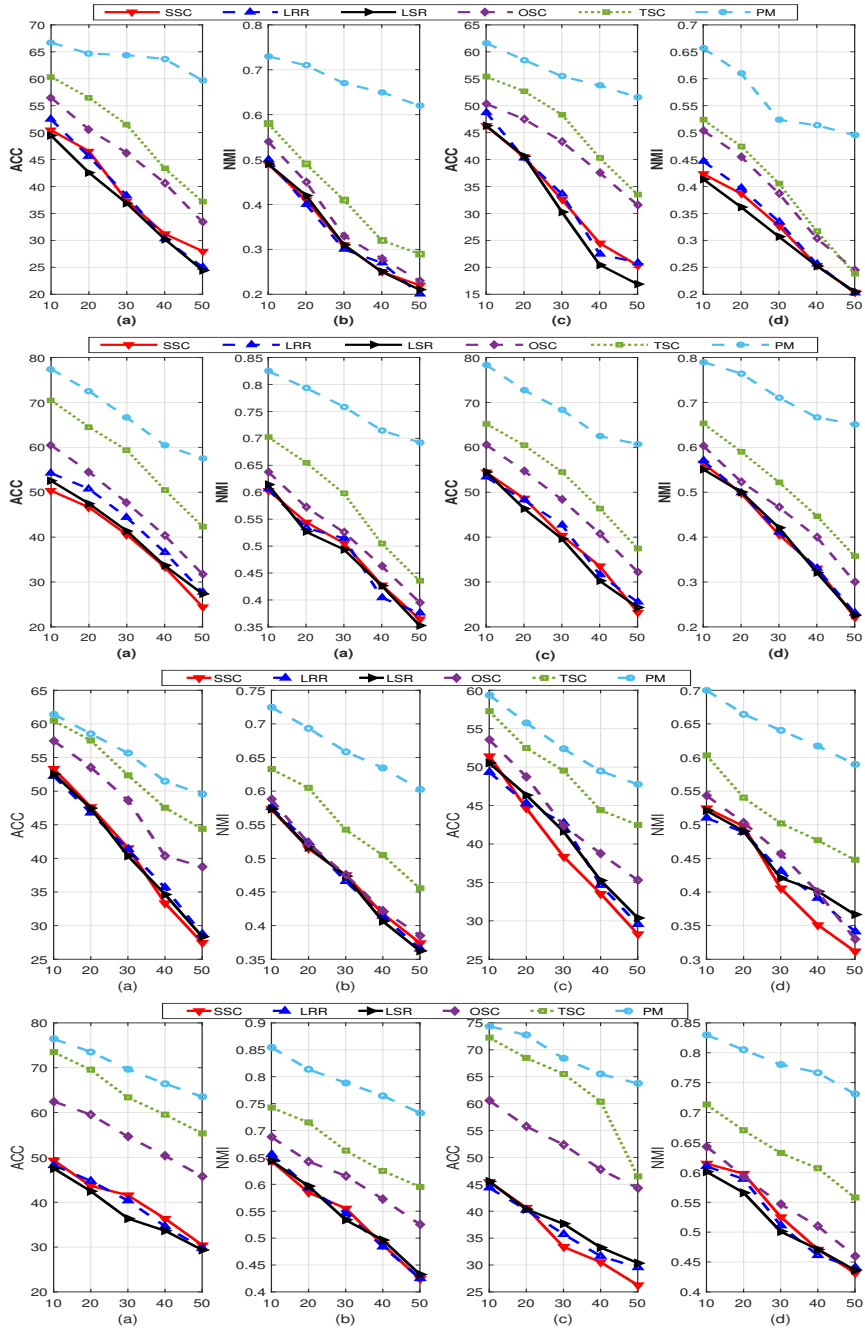

Figure 3. The results of different methods on Mocap dataset when the data suffer from the loss of features. First Row: **Subject 13**. Second Row: **Subject 54**. Third Row: **Subject 80**. Forth Row: **Subject 113**. Horizontal axes denote the missing rates (%). (a),(b): ACC and NMI results for MAR features, respectively. (c),(d): ACC and NMI results for NMAR features, respectively.
